# Supplementary material for: C-225 FISH法による東京湾海水中微生物群集の解析(遺伝子解析など-3、群集構造解析-4,ポスター発表)
Source: PeerJ journal article supplement (doi:10.7717/peerj.4182), 2000-11-12
Supplement: PeerJ_Supplementary_material.pdf [file PeerJ_Supplementary_material.pdf]

## Supplementary Material

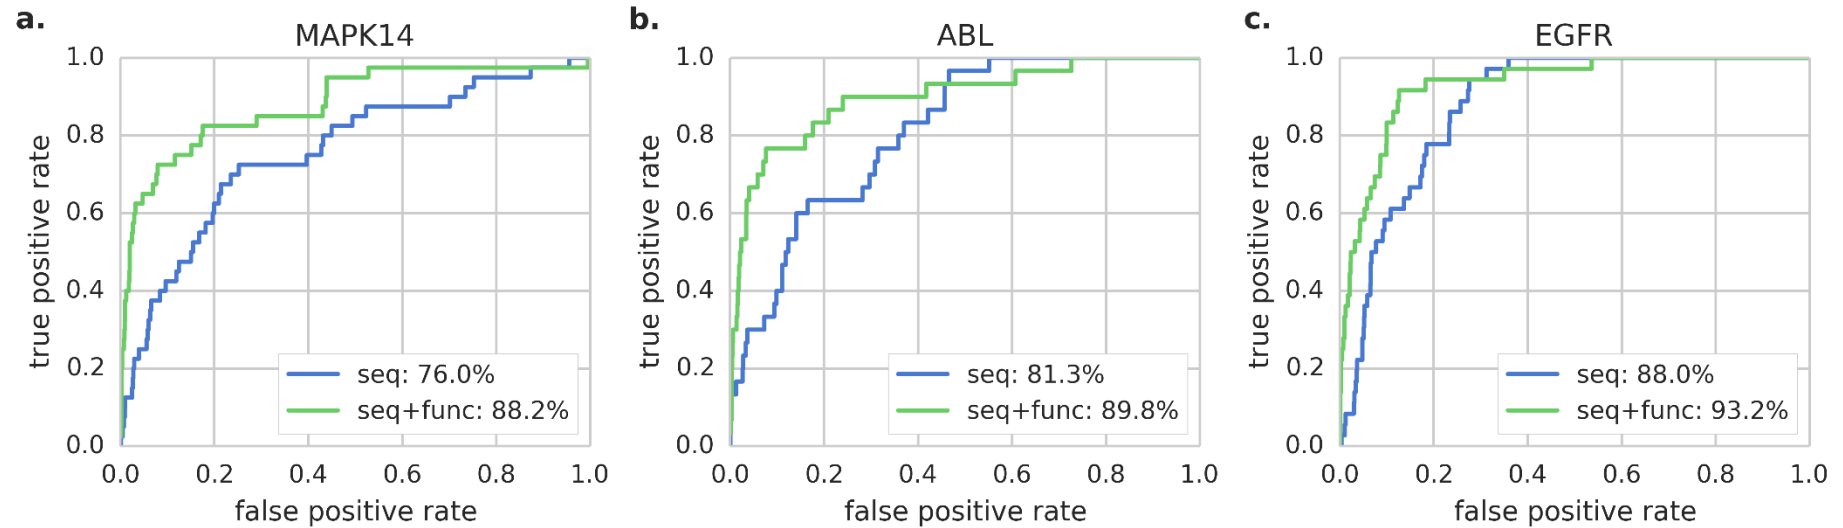

**Figure S1. Comparison of ROC curves using different information.** Panels (a-c) represent the ROC curves of MAPK14, ABL and EGFR using different information, respectively. The blue lines represent our proposed method constructed with local sequence, and the green lines represent our proposed method built with local sequence and functional information together.

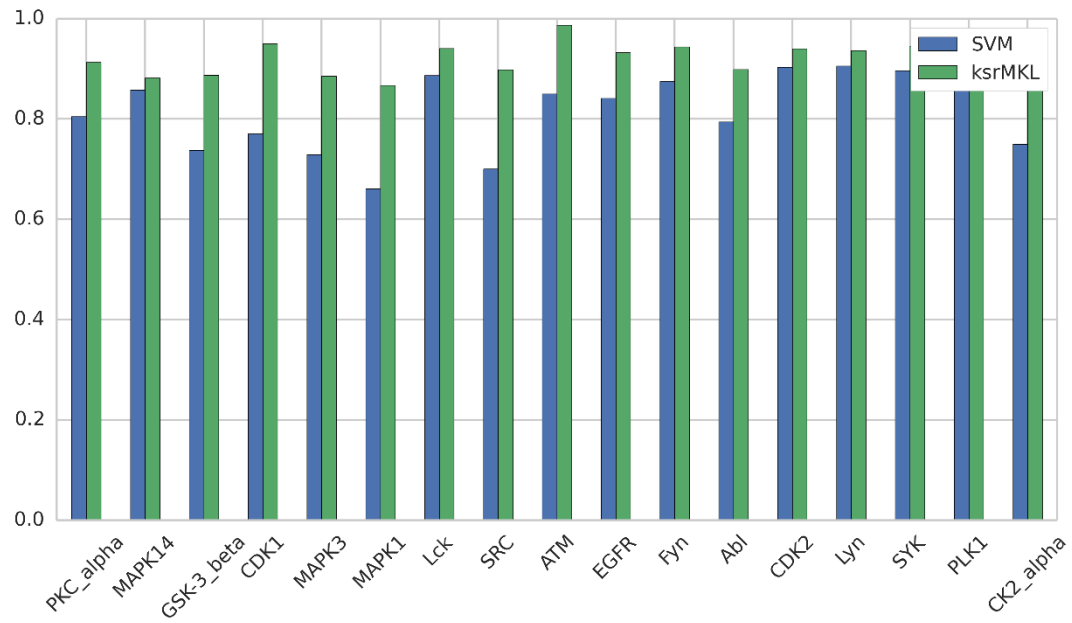

**Figure S2. Compare the AUC values with different methods.** The green lines represent the ROC curve of ksrMKL, and the blue lines represent the ROC curves of SVM.

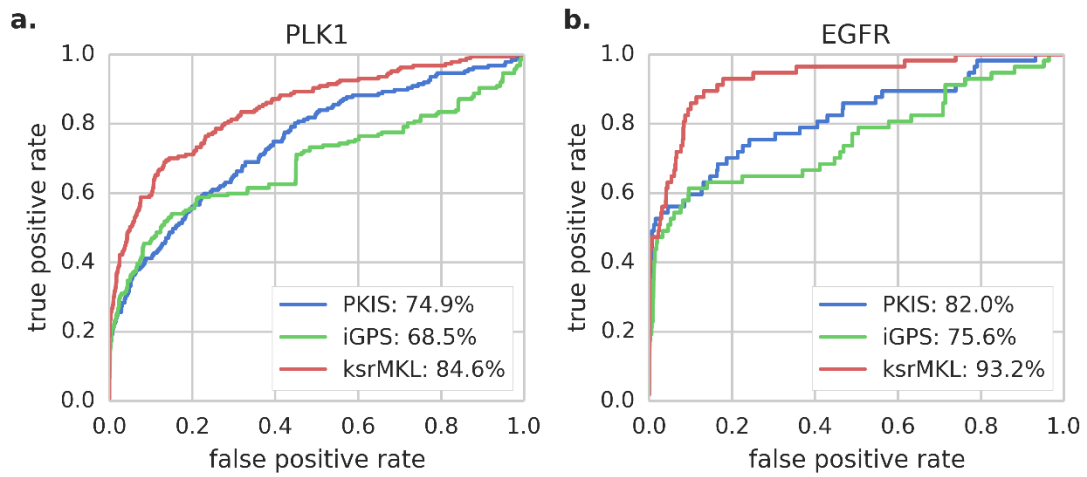

**Figure S3. Compare the ROC curves with existing tools on the independent dataset.** Panels (a-b) represent the ROC curves of PLK1 and EGFR using different tools on the independent dataset, respectively. The red lines represent our proposed method (ksrMKL), and the green and blue lines represent iGPS and PKIS tools, respectively.

**Table S1. The number of known phosphorylation sites of 17 kinases.**

| <b>Kinases</b> | <b>Number</b> | <b>Kinases</b> | <b>Number</b> |
|----------------|---------------|----------------|---------------|
| PKCa           | 100           | EGFR           | 36            |
| MAPK14         | 40            | Fyn            | 30            |
| GSK3b          | 41            | Abl            | 30            |
| CDK1           | 112           | CDK2           | 51            |
| MAPK3          | 71            | Lyn            | 28            |
| MAPK1          | 83            | SYK            | 37            |
| Lck            | 45            | PLK1           | 37            |
| SRC            | 87            | CK2a           | 99            |
| ATM            | 51            |                |               |

**Table S2. Compare the predictive performance of different tools at high (Sp = 95.0%) and medium (Sp = 90.0%) stringency level.**

| Kinase  | Method | Sp = 95% |       |       |       | Sp = 90% |       |       |       |
|---------|--------|----------|-------|-------|-------|----------|-------|-------|-------|
|         |        | Sn       | MCC   | F1    | Pre   | Sn       | MCC   | F1    | Pre   |
| CK2a    | iGPS   | 50.0%    | 9.7%  | 4.2%  | 2.2%  | 66.7%    | 8.9%  | 2.9%  | 1.5%  |
|         | PKIS   | 25.0%    | 4.3%  | 2.1%  | 1.1%  | 58.3%    | 7.6%  | 2.5%  | 1.3%  |
|         | ksrMKL | 58.3%    | 11.4% | 4.9%  | 2.6%  | 83.3%    | 11.5% | 3.6%  | 1.8%  |
| Lyn     | iGPS   | 18.6%    | 5.5%  | 5.1%  | 2.9%  | 34.9%    | 7.3%  | 5.1%  | 2.8%  |
|         | PKIS   | 16.3%    | 4.6%  | 4.4%  | 2.6%  | 27.9%    | 5.3%  | 4.1%  | 2.2%  |
|         | ksrMKL | 39.5%    | 13.8% | 10.5% | 6.0%  | 58.1%    | 14.1% | 8.4%  | 4.5%  |
| PLK1    | iGPS   | 27.3%    | 15.5% | 17.4% | 12.8% | 42.4%    | 16.6% | 16.4% | 10.2% |
|         | PKIS   | 19.4%    | 10.2% | 12.7% | 9.4%  | 30.9%    | 10.8% | 12.2% | 7.6%  |
|         | ksrMKL | 43.2%    | 25.6% | 26.1% | 18.8% | 56.1%    | 23.3% | 21.1% | 13.0% |
| SYK     | iGPS   | 40.0%    | 6.9%  | 2.8%  | 1.5%  | 50.0%    | 5.7%  | 1.8%  | 0.9%  |
|         | PKIS   | 30.0%    | 4.9%  | 2.1%  | 1.1%  | 40.0%    | 4.3%  | 1.5%  | 0.7%  |
|         | ksrMKL | 40.0%    | 6.9%  | 2.8%  | 1.5%  | 60.0%    | 7.2%  | 2.2%  | 1.1%  |
| Abl     | iGPS   | 30.8%    | 14.7% | 14.7% | 9.6%  | 30.8%    | 8.8%  | 8.7%  | 5.1%  |
|         | PKIS   | 38.5%    | 18.9% | 18.0% | 11.7% | 52.7%    | 17.9% | 14.5% | 8.4%  |
|         | ksrMKL | 56.0%    | 28.1% | 25.2% | 16.2% | 81.3%    | 29.3% | 21.4% | 12.4% |
| CDK2    | iGPS   | 22.1%    | 19.5% | 25.2% | 29.3% | 32.0%    | 19.0% | 26.8% | 23.0% |
|         | PKIS   | 16.7%    | 13.7% | 19.6% | 23.8% | 28.3%    | 16.0% | 24.0% | 20.9% |
|         | ksrMKL | 41.9%    | 37.7% | 42.9% | 43.9% | 58.3%    | 38.8% | 43.9% | 35.2% |
| EGFR    | iGPS   | 30.0%    | 8.5%  | 5.9%  | 3.3%  | 36.7%    | 6.6%  | 3.8%  | 2.0%  |
|         | PKIS   | 30.0%    | 8.5%  | 5.9%  | 3.3%  | 33.3%    | 5.8%  | 3.5%  | 1.8%  |
|         | ksrMKL | 40.0%    | 11.8% | 7.8%  | 4.3%  | 76.7%    | 16.3% | 7.9%  | 4.2%  |
| Fyn     | iGPS   | 46.4%    | 18.6% | 15.0% | 9.0%  | 57.1%    | 15.7% | 10.4% | 5.7%  |
|         | PKIS   | 21.4%    | 7.6%  | 7.2%  | 4.3%  | 39.3%    | 9.8%  | 7.2%  | 4.0%  |
|         | ksrMKL | 46.4%    | 18.6% | 15.0% | 9.0%  | 62.5%    | 17.4% | 11.3% | 6.2%  |
| ATM     | iGPS   | 51.2%    | 32.5% | 33.1% | 24.5% | 57.3%    | 25.6% | 24.2% | 15.4% |
|         | PKIS   | 59.8%    | 37.8% | 37.6% | 27.5% | 79.3%    | 36.6% | 32.0% | 20.1% |
|         | ksrMKL | 90.9%    | 55.8% | 52.1% | 36.5% | 97.6%    | 45.4% | 38.0% | 23.6% |
| Lck     | iGPS   | 65.2%    | 17.7% | 9.9%  | 5.3%  | 65.2%    | 11.9% | 5.3%  | 2.7%  |
|         | PKIS   | 30.4%    | 7.6%  | 4.7%  | 2.6%  | 47.8%    | 8.2%  | 3.9%  | 2.0%  |
|         | ksrMKL | 69.6%    | 18.9% | 10.5% | 5.7%  | 91.3%    | 17.5% | 7.3%  | 3.8%  |
| MAPK1   | iGPS   | 40.6%    | 26.6% | 28.6% | 22.1% | 62.2%    | 29.3% | 27.7% | 17.8% |
|         | PKIS   | 21.7%    | 13.1% | 16.4% | 13.1% | 36.7%    | 15.4% | 17.3% | 11.3% |
|         | ksrMKL | 40.6%    | 26.6% | 28.6% | 22.1% | 66.1%    | 31.3% | 29.2% | 18.7% |
| MAPK3   | iGPS   | 39.9%    | 24.1% | 25.3% | 18.5% | 47.3%    | 19.5% | 19.0% | 11.9% |
|         | PKIS   | 20.3%    | 11.1% | 13.7% | 10.3% | 34.5%    | 13.0% | 14.2% | 8.9%  |
|         | ksrMKL | 41.2%    | 25.0% | 26.0% | 19.0% | 64.2%    | 27.9% | 24.9% | 15.4% |
| SRC     | iGPS   | 55.6%    | 41.8% | 44.4% | 37.0% | 57.8%    | 31.7% | 33.3% | 23.4% |
|         | PKIS   | 38.4%    | 29.2% | 33.0% | 28.9% | 55.6%    | 30.3% | 32.2% | 22.7% |
|         | ksrMKL | 84.3%    | 60.6% | 60.4% | 47.1% | 98.1%    | 54.7% | 50.6% | 34.1% |
| CDK1    | iGPS   | 39.0%    | 31.1% | 35.3% | 32.3% | 42.2%    | 23.2% | 27.6% | 20.5% |
|         | PKIS   | 26.0%    | 20.2% | 25.0% | 24.1% | 43.2%    | 23.9% | 28.1% | 20.9% |
|         | ksrMKL | 48.7%    | 38.6% | 42.3% | 37.3% | 69.8%    | 40.8% | 41.9% | 29.9% |
| GSK3b   | iGPS   | 12.6%    | 5.4%  | 8.3%  | 6.1%  | 18.5%    | 4.4%  | 7.3%  | 4.6%  |
|         | PKIS   | 17.0%    | 8.4%  | 11.0% | 8.1%  | 32.6%    | 11.5% | 12.6% | 7.8%  |
|         | ksrMKL | 31.9%    | 18.2% | 19.6% | 14.2% | 45.9%    | 18.1% | 17.3% | 10.6% |
| MAPK14  | iGPS   | 35.0%    | 17.9% | 18.0% | 12.1% | 62.1%    | 22.9% | 18.5% | 10.9% |
|         | PKIS   | 16.5%    | 7.1%  | 8.9%  | 6.1%  | 25.2%    | 6.9%  | 8.0%  | 4.7%  |
|         | ksrMKL | 31.1%    | 15.7% | 16.1% | 10.9% | 40.8%    | 13.8% | 12.6% | 7.4%  |
| PKCa    | iGPS   | 29.1%    | 21.7% | 25.8% | 23.3% | 39.6%    | 20.2% | 23.9% | 17.1% |
|         | PKIS   | 27.2%    | 20.1% | 24.4% | 22.1% | 36.2%    | 18.0% | 22.1% | 15.9% |
|         | ksrMKL | 35.5%    | 26.8% | 30.7% | 27.0% | 54.3%    | 29.4% | 31.4% | 22.1% |
| Average | iGPS   | 37.3%    | 18.7% | 18.8% | 14.8% | 47.2%    | 16.3% | 15.5% | 10.3% |
|         | PKIS   | 26.7%    | 13.4% | 14.5% | 11.8% | 41.3%    | 14.2% | 14.1% | 9.5%  |
|         | ksrMKL | 49.4%    | 25.9% | 24.8% | 18.9% | 68.5%    | 25.7% | 21.9% | 14.4% |

Average: Average performance of all kinases

**Table S3. Information of top 20 potential phosphorylation sites for MAPK1 kinase.**

| <b>Ranking</b> | <b>UniProt ID</b> | <b>Protein Name</b> | <b>Position</b> | <b>Score</b> | <b>Ranking</b> | <b>UniProt ID</b> | <b>Protein Name</b> | <b>Position</b> | <b>Score</b> |
|----------------|-------------------|---------------------|-----------------|--------------|----------------|-------------------|---------------------|-----------------|--------------|
| <b>1</b>       | P01100            | FOS                 | 331             | 1.100        | <b>11</b>      | Q15149            | PLEC                | 4539            | 0.764        |
| <b>2</b>       | Q15796            | SMAD2               | 220             | 0.997        | <b>12</b>      | P24928            | POLR2A              | 1616            | 0.745        |
| <b>3</b>       | Q9UBK2            | PPARGC1A            | 299             | 0.907        | <b>13</b>      | P01106            | MYC                 | 58              | 0.739        |
| <b>4</b>       | P10276            | RARA                | 77              | 0.856        | <b>14</b>      | Q9UBK2            | PPARGC1A            | 263             | 0.717        |
| <b>5</b>       | P17676            | CEBPB               | 235             | 0.853        | <b>15</b>      | P36956            | SREBF1              | 439             | 0.707        |
| <b>6</b>       | P56270            | MAZ                 | 72              | 0.841        | <b>16</b>      | P41212            | ETV6                | 257             | 0.688        |
| <b>7</b>       | Q9NQU5            | PAK6                | 165             | 0.829        | <b>17</b>      | P01100            | FOS                 | 325             | 0.683        |
| <b>8</b>       | P19634            | SLC9A1              | 726             | 0.826        | <b>18</b>      | P49137            | MAPKAPK2            | 25              | 0.658        |
| <b>9</b>       | P40763            | STAT3               | 727             | 0.826        | <b>19</b>      | Q15796            | SMAD2               | 245             | 0.648        |
| <b>10</b>      | Q04206            | RELA                | 529             | 0.821        | <b>20</b>      | Q9UJU2            | LEF1                | 155             | 0.628        |
